# Supplementary material
Source: PubMed Central journal article supplement (PMC6448102)
Supplement: Supplementary_Data.pdf [file Supplementary_Data.pdf]

## Supplementary methods

To profile the piwi protein expression in the stomach, we used microarray and immunohistochemistry technologies.

**Microarray.** Tissue microarray recipient blocks containing 181 gastric cancer tissues and 181 normal adjacent tissues were constructed from formalin-fixed paraffin-embedded specimens. We located the appropriate tissue of the normal and tumor tissues under the microscope. Then three tissue cores (1.5-mm in diameter) were transferred to a new recipient paraffin block using a microarray instrument, according to established methods. One cylinder of normal gastric mucosa adjacent to each tumor was also transferred to the recipient block. Sections (3 mm thick) were cut the day before use and stained according to standard protocol.

**Immunohistochemistry.** Immunostaining was conducted on 5- $\mu$ m paraffin-embedded tissue sections using antigen retrieval with EDTA buffer and the EliVision Plus horseradish peroxidase. Staining was performed using an UltraSensitive S-P (goat) kit (Lab Vision Corp, Kalamazoo, MI, USA), following the manufacturer's recommendations. The sections were incubated overnight at 4°C with PIWIL4 antibodies (1/200; cat no. ab111714; Abcam, Cambridge, UK). The results were reviewed independently by two pathologists. Immunostaining was assessed semi-quantitatively by measuring both the intensity of the staining (score A = 0, 1, 2 or 3) and extent of staining (score B=0, 0%; 1, 1-10%; 2, 11-50%; 3, 51-80% or 4, 81-100%). The scores for the intensity and extent of staining were multiplied (possible maximum A x B=12) to give a weighted score (-, 0-1; 1+, 1-2; 2+, 3-4; or 3+, 6-12) for each case (1). The weighted scores were grouped in two categories where scores of  $\leq 1+$  were considered as negative expression and  $\geq 2+$  as positive expression. Further, the weighted score distribution was compared between cases and controls using the extended 2 by 4 Fisher Exact Test.

## References to Supplementary Materials

1. Taubert H, Wach S, Jung R, Pugia M, Keck B, Bertz S, Nolte E, Stoehr R, Lehmann J, Ohlmann CH, *et al*: Piwil 2 expression is correlated with disease-specific and progression-free survival of chemotherapy-treated bladder cancer patients. *Mol Med* 21: 371-380, 2015.
2. Ovaska K, Matarese F, Grote K, Charapitsa I, Cervera A, Liu C, Reid G, Seifert M, Stunnenberg HG and Hautaniemi S: Integrative analysis of deep sequencing data identifies estrogen receptor early response genes and links ATAD3B to poor survival in breast cancer. *PLoS Comput Biol* 9: e1003100, 2013.
3. Merle N, Feraud O, Gilquin B, Hubstenberger A, Kieffer-Jacquinet S, Assard N, Bennaceur-Griscelli A, Honnorat J and Baudier J: ATAD3B is a human embryonic stem cell specific mitochondrial protein, re-expressed in cancer cells, that functions as dominant negative for the ubiquitous ATAD3A. *Mitochondrion* 12: 441-448, 2012.
4. Tian Z, Du J, Yang J, Liu A, Liu X, Liu G and Yin H: A PCR-RFLP Assay targeting RPS8 gene for the discrimination between bovine Babesia and Theileria species in China. *Parasit Vectors* 8: 475, 2015.
5. Tian ZC, Liu GY, Yin H, Luo JX, Guan GQ, Luo J, Xie JR, Shen H, Tian MY, Zheng JF, *et al*: RPS8-a new informative DNA marker for phylogeny of Babesia and Theileria parasites in China. *PLoS One* 8: e79860, 2013.
6. Nakao T, Kurita N, Komatsu M, Yoshikawa K, Iwata T, Utsunomiya T and Shimada M: Expression of thrombospondin-1 and Ski are prognostic factors in advanced gastric cancer. *Int J Clin Oncol* 16: 145-152, 2011.
7. Takahata M, Inoue Y, Tsuda H, Imoto I, Koinuma D, Hayashi M, Ichikura T, Yamori T, Nagasaki K, Yoshida M, *et al*: SKI and MEL1 cooperate to inhibit transforming growth factor-beta signal in gastric cancer cells. *J Biol Chem* 284: 3334-3344, 2009.
8. Song L, Chen X, Gao S, Zhang C, Qu C, Wang P and Liu L: Ski modulate the characteristics of pancreatic cancer stem cells via regulating sonic hedgehog signaling pathway. *Tumour Biol*, Oct 12, 2016 (Epub ahead of print).
9. McNaughton M, Pitman M, Pitson SM, Pyne NJ and Pyne S: Proteasomal degradation of sphingosine kinase 1 and inhibition of dihydroceramide desaturase by the sphingosine kinase inhibitors, SKI or ABC294640, induces growth arrest in androgen-independent LNCaP-AI prostate cancer cells. *Oncotarget* 7: 16663-16675, 2016.
10. Xie M, Wu X, He C, Zhang J and Zhang J: Ski is silenced by methylation and acts as tumor suppressor in non-small cell lung cancer. *Oncotarget* 5, 2015.
11. Yang H, Zhan L, Yang T, Wang L, Li C, Zhao J, Lei Z, Li X and Zhang HT: Ski prevents TGF- $\beta$ -induced EMT and cell invasion by repressing SMAD-dependent signaling in non-small cell lung cancer. *Oncol Rep* 34: 87-94, 2015.
12. Yong WK and Abd Malek SN: Xanthohumol induces growth inhibition and apoptosis in ca ski human cervical cancer cells. *Evid Based Complement Alternat Med* 2015: 921306, 2015.
13. Rashidian J, Le Scolan E, Ji X, Zhu Q, Mulvihill MM, Nomura D and Luo K: Ski regulates Hippo and TAZ signaling to suppress breast cancer progression. *Sci Signal* 8: ra14, 2015.
14. Liljefors M, Ragnhammar P, Nilsson B, Ullenhag G, Mellstedt H and Frödin JE: Anti-EpCAM monoclonal antibody (MAB17-1A) based treatment combined with alpha-interferon, 5-fluorouracil and granulocyte-macrophage colony-stimulating factor in patients with metastatic colorectal carcinoma. *Int J Oncol* 25: 703-711, 2004.
15. Oosterhoff D, Overmeer RM, de Graaf M, van der Meulen IH, Giaccone G, van Beusechem VW, Haisma HJ, Pinedo HM and Gerritsen WR: Adenoviral vector-mediated expression of a gene encoding secreted, EpCAM-targeted carboxylesterase-2 sensitises colon cancer spheroids to CPT-11. *Br J Cancer* 92: 882-887, 2005.
16. Xie X, Li F, Zhang H, Lu Y, Lian S, Lin H, Gao Y and Jia L: EpCAM aptamer-functionalized mesoporous silica nanoparticles for efficient colon cancer cell-targeted drug delivery. *Eur J Pharm Sci* 83: 28-35, 2016.
17. Sebastian M, Passlick B, Friccus-Quecke H, Jäger M, Lindhofer H, Kannies F, Wiewrodt R, Thiel E, Buhl R and Schmittel A: Treatment of non-small cell lung cancer patients with the trifunctional monoclonal antibody catumaxomab (anti-EpCAM x anti-CD3): A phase I study. *Cancer Immunol Immunother* 56: 1637-1644, 2007.
18. Kang JS: Increased expression of epithelial cell adhesion molecule (EpCAM) in rat hepatic tumors induced by diethylnitrosamine. *Asian Pac J Cancer Prev* 13: 3627-3630, 2012.
19. Chan AW, Tong JH, Chan SL, Lai PB and To KF: Expression of stemness markers (CD133 and EpCAM) in prognostication of hepatocellular carcinoma. *Histopathology* 64: 935-950, 2004.
20. Subramanian N, Kanwar JR, Kanwar RK, Sreemanthula J, Biswas J, Khetan V and Krishnakumar S: EpCAM Aptamer-siRNA chimera targets and regress epithelial cancer. *PLoS One* 10: e0132407, 2015.
21. Jiang YZ, Yu KD, Peng WT, Di GH, Wu J, Liu GY and Shao ZM: Enriched variations in TEKT4 and breast cancer resistance to paclitaxel. *Nat Commun* 5: 3802, 2014.
22. Wang W, Wu Y, Wang C, Jiao J and Klein CJ: Copy number analysis reveals a novel multixon deletion of the COLQ gene in congenital myasthenia. *Neurol Genet* 2: e117, 2016.
23. Campbell JM, Lockwood WW, Buys TP, Chari R, Coe BP, Lam S and Lam WL: Integrative genomic and gene expression analysis of chromosome 7 identified novel oncogene loci in non-small cell lung cancer. *Genome* 51: 1032-1039, 2008.
24. Wang SY, Gao K, Deng DL, Cai JJ, Xiao ZY, He LQ, Jiao HL, Ye YP, Yang RW, Li TT, *et al*: TLE4 promotes colorectal cancer progression through activation of JNK/c-Jun signaling pathway. *Oncotarget* 7: 2878-2888, 2016.
25. Shin TH, Brynczka C, Dayyani F, Rivera MN and Sweetser DA: TLE4 regulation of wnt-mediated inflammation underlies its role as a tumor suppressor in myeloid leukemia. *Leuk Res* 48: 46-56, 2016.
26. Suzuki T, Kasamatsu A, Miyamoto I, Saito T, Higo M, Endo-Sakamoto Y, Shiiba M, Tanzawa H and Uzawa K: Overexpression of TMOD1 is associated with enhanced regional lymph node metastasis in human oral cancer. *Int J Oncol* 48: 607-612, 2016.
27. Liu YL, Gao X, Jiang Y, Zhang G, Sun ZC, Cui BB and Yang YM: Expression and clinicopathological significance of EED, SUZ12 and EZH2 mRNA in colorectal cancer. *J Cancer Res Clin Oncol* 141: 661-669, 2015.
28. Seo GS, Yu JI, Chae SC, Park WC, Shin SR, Yoo ST, Choi SC and Lee SH: EED gene polymorphism in patients with colorectal cancer. *Int J Biol Markers* 28: 274-279, 2013.

29. Buhl AM, James DF, Neuberg D, Jain S, Rassenti LZ and Kipps TJ: Analysis of CLLU1 expression levels before and after therapy in patients with chronic lymphocytic leukemia. *Eur J Haematol* 86: 405-411, 2011.
30. Jiang SH, He P, Ma MZ, Wang Y, Li RK, Fang F, Fu Y, Tian GA, Qin WX and Zhang ZG: PNMA1 promotes cell growth in human pancreatic ductal adenocarcinoma. *Int J Clin Exp Pathol* 7: 3827-3835, 2014.
31. Pellkofer H, Schubart AS, Höftberger R, Schütze N, Pagany M, Schüller M, Lassmann H, Hohlfeld R, Voltz R and Linington C: Modelling paraneoplastic CNS disease: T-cells specific for the onconeural antigen PNMA1 mediate autoimmune encephalomyelitis in the rat. *Brain* 127: 1822-1830, 2004.
32. Schüller M, Jenne D and Voltz R: The human PNMA family: Novel neuronal proteins implicated in paraneoplastic neurological disease. *J Neuroimmunol* 169: 172-176, 2005.
33. Hoffmann LA, Jarius S, Pellkofer HL, Schueller M, Krumbholz M, Koenig F, Johannis W, la Fougere C, Newman T, Vincent A and Voltz R: Anti-Ma and anti-Ta associated paraneoplastic neurological syndromes: 22 newly diagnosed patients and review of previous cases. *J Neurol Neurosurg Psychiatry* 79: 767-773, 2008.
34. Zhang Y, Zolov SN, Chow CY, Slutsky SG, Richardson SC, Piper RC, Yang B, Nau JJ, Westrick RJ, Morrison SJ, *et al*: Loss of Vac14, a regulator of the signaling lipid phosphatidylinositol 3,5-bisphosphate, results in neurodegeneration in mice. *Proc Natl Acad Sci USA* 104: 17518-17523, 2007.
35. White RM, Cech J, Ratanasirintrao S, Lin CY, Rahl PB, Burke CJ, Langdon E, Tomlinson ML, Mosher J, Kaufman C, *et al*: DHODH modulates transcriptional elongation in the neural crest and melanoma. *Nature* 471: 518-522, 2001.
36. Hong CS, Jeong O, Piao Z, Guo C, Jung MR, Choi C and Park YK: HOXB5 induces invasion and migration through direct transcriptional up-regulation of  $\beta$ -catenin in human gastric carcinoma. *Biochem J* 472: 393-403, 2015.
37. Lee JY, Hur H, Yun HJ, Kim Y, Yang S, Kim SI and Kim MH: HOXB5 promotes the proliferation and invasion of breast cancer cells. *Int J Biol Sci* 11: 701-711, 2015.
38. Luo J, Cai Q, Wang W, Huang H, Zeng H, He W, Deng W, Yu H, Chan E, Ng CF, *et al*: A microRNA-7 binding site polymorphism in HOXB5 leads to differential gene expression in bladder cancer. *PLoS One* 7: e40127, 2012.
39. Tucci R, Campos MS, Matizonkas-Antonio LF, Durazzo M, Pinto Junior Ddos S and Nunes FD: HOXB5 expression in oral squamous cell carcinoma. *J Appl Oral Sci* 19: 125-129, 2011.
40. Wu Q, Lothe RA, Ahlquist T, Silins I, Tropé CG, Micci F, Nesland JM, Suo Z and Lind GE: DNA methylation profiling of ovarian carcinomas and their in vitro models identifies HOXA9, HOXB5, SCGB3A1, and CRABP1 as novel targets. *Mol Cancer* 6: 45, 2007.
41. Bradfield JP, Taal HR, Timpson NJ, Scherag A, Lecoer C, Warrington NM, Hypponen E, Holst C, Valcarcel B, Thiering E, *et al*: A genome-wide association meta-analysis identifies new childhood obesity loci. *Nat Genet* 44: 526-531, 2012.
42. Ohlsson L, Hammarström ML, Lindmark G, Hammarström S and Sitohy B: Ectopic expression of the chemokine CXCL17 in colon cancer cells. *Br J Cancer* 114: 697-703, 2016.
43. Li L, Yan J, Xu J, Liu CQ, Zhen ZJ, Chen HW, Ji Y, Wu ZP, Hu JY, Zheng L and Lau WY: CXCL17 expression predicts poor prognosis and correlates with adverse immune infiltration in hepatocellular carcinoma. *PLoS One* 9: e110064, 2014.
44. Burkhardt AM, Maravillas-Montero JL, Carnevale CD, Vilches-Cisneros N, Flores JP, Hevezi PA and Zlotnik A: CXCL17 is a major chemotactic factor for lung macrophages. *J Immunol* 193: 1468-1474, 2014.
45. Matsui A, Yokoo H, Negishi Y, Endo-Takahashi Y, Chun NA, Kadouchi I, Suzuki R, Maruyama K, Aramaki Y, Semba K, *et al*: CXCL17 expression by tumor cells recruits CD11b+Grl high F4/80-cells and promotes tumor progression. *PLoS One* 7: e44080, 2012.
46. Hiraoka N, Yamazaki-Itoh R, Ino Y, Mizuguchi Y, Yamada T, Hirohashi S and Kanai Y: CXCL17 and ICAM2 are associated with a potential anti-tumor immune response in early intraepithelial stages of human pancreatic carcinogenesis. *Gastroenterology* 140: 310-321, 2011.
47. Russo A, Maiolino S, Pagliara V, Ungaro F, Tatangelo F, Leone A, Scalia G, Budillon A, Quaglia F and Russo G: Enhancement of 5-FU sensitivity by the proapoptotic rpL3 gene in p53 null colon cancer cells through combined polymer nanoparticles. *Oncotarget* 7: 79670-79687, 2016.
48. Pagliara V, Saide A, Mitidieri E, d'Emmanuele di Villa Bianca R, Sorrentino R, Russo G and Russo A: 5-FU targets rpL3 to induce mitochondrial apoptosis via cystathionine- $\beta$ -synthase in colon cancer cells lacking p53. *Oncotarget* 7: 50333-50348, 2016.
49. Russo A, Pagliara V, Albano F, Esposito D, Sagar V, Loreni F, Irace C, Santamaria R and Russo G: Regulatory role of rpL3 in cell response to nucleolar stress induced by Act D in tumor cells lacking functional p53. *Cell Cycle* 15: 41-51, 2016.
50. Wang J, Figueroa JD, Wallstrom G, Barker K, Park JG, Demirkan G, Lissowska J, Anderson KS, Qiu J and LaBaer J: Plasma autoantibodies associated with basal-like breast cancers. *Cancer Epidemiol Biomarkers Prev* 24: 1332-1340, 2015.
51. Nourashrafeddin S, Aarabi M, Modarressi MH, Rahmati M and Nouri M: The evaluation of WBP2NL-related genes expression in breast cancer. *Pathol Oncol Res* 21: 293-300, 2015.
52. Nourashrafeddin S, Dianatpour M, Aarabi M, Mobasheri MB, Kazemi-Oula G and Modarressi MH: Elevated expression of the testis-specific gene WBP2NL in breast cancer. *Biomark Cancer* 7: 19-24, 2015.
53. Hu N, Wang Z, Song X, Wei L, Kim BS, Freedman ND, Baek J, Burdette L, Chang J, Chung C, *et al*: Genome-wide association study of gastric adenocarcinoma in Asia: A comparison of associations between cardia and non-cardia tumours. *Gut* 65: 1611-1618, 2016.
54. Abnet CC, Freedman ND, Hu N, Wang Z, Yu K, Shu XO, Yuan JM, Zheng W, Dawsey SM, Dong LM, *et al*: A shared susceptibility locus in PLE1 at 10q23 for gastric adenocarcinoma and esophageal squamous cell carcinoma. *Nat Genet* 42: 764-767, 2010.
55. Wang Z, Dai J, Hu N, Miao X, Abnet CC, Yang M, Freedman ND, Chen J, Burdette L, Zhu X, *et al*: Identification of new susceptibility loci for gastric non-cardia adenocarcinoma: Pooled results from two Chinese genome-wide association studies. *Gut* 66: 581-587, 2017.
56. Helgason H, Rafnar T, Olafsdottir HS, Jonasson JG, Sigurdsson A, Stacey SN, Jonasdottir A, Tryggvadottir L, Alexiusdottir K, Haraldsson A, *et al*: Loss-of-function variants in ATM confer risk of gastric cancer. *Nat Genet* 47: 906-910, 2015.
57. Shi Y, Hu Z, Wu C, Dai J, Li H, Dong J, Wang M, Miao X, Zhou Y, Lu F, *et al*: A genome-wide association study identifies new susceptibility loci for non-cardia gastric cancer at 3q13.1 and 5p13.1. *Nat Genet* 43: 1215-1218, 2011.

Figure S1. The distributions of intensities from all samples.

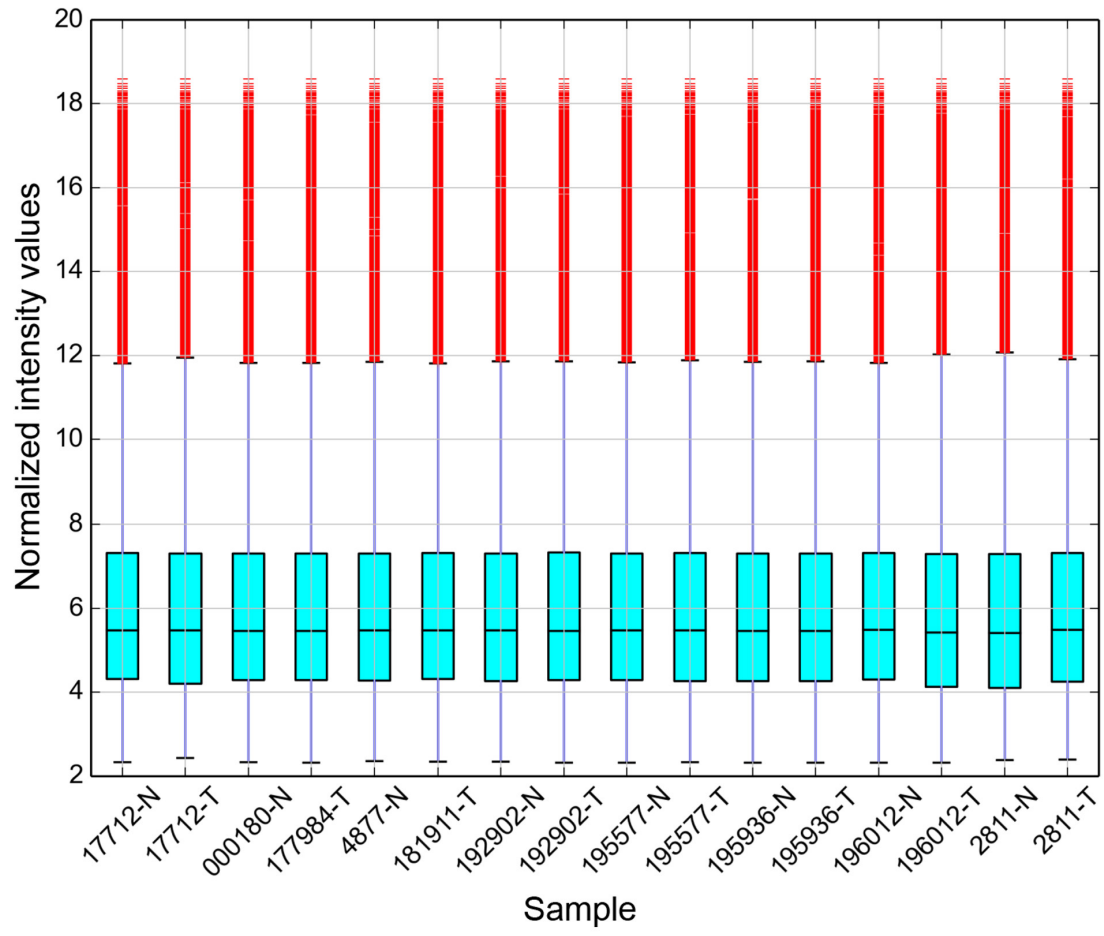

Figure S2. The Scatter-plot for the intensity reproducibility between cases and controls.

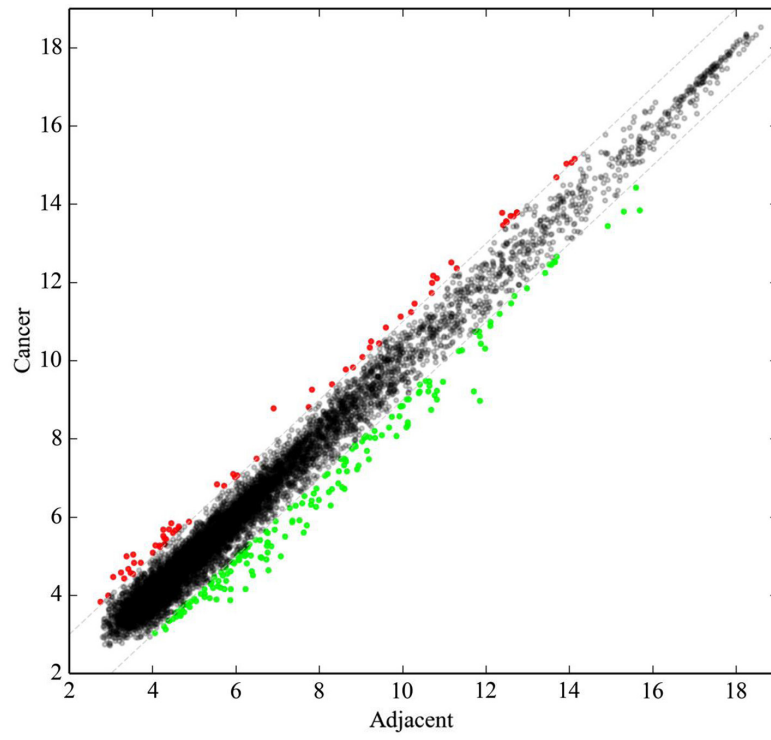

Figure S3. Illustration for the pathways underlying piRNA-GC association. Solid lines: Directly evidenced by our study; dash lines: Indirectly evidenced by the literature. ① piRNA expression is correlated with the risk SNPs (by eQTL analysis). ② piRNAs may regulate the expression of the nearest protein-coding genes by sequence complementarity via non-TE pathway. ③ mRNAs/proteins of the risk protein-coding genes are expressed in the stomach (by RNA-Seq, RNA microarray and mass spectrometry-based proteomics microarray analyses). ④ RNAs/proteins expressed in the stomach are assumed to have potential physiological functions. ⑤ Many physiological functions are assumed to be related to the development of GC. ⑥ piRNAs are hypothesized to suppress RNA retrotransposons that might regulate transcription of proximate genes. ⑦ piRNAs are hypothesized to suppress DNA transposons that might regulate transcription of proximate genes. ⑧ Many genes have been associated with GC in the literature. ⑨ Some genes regulated by piRNAs exert physiological functions in the stomach. ⑩ piRNA expression in the stomach is detected by microarray analysis. ⑪ piRNAs are associated with GC (by differential expression analysis), which is the main goal of the present study. ⑫ Associations between SNPs and GC are identified by GWAS. SNPs, single nucleotide polymorphisms; GC, gastric cancer; GWAS, genome-wide association study.

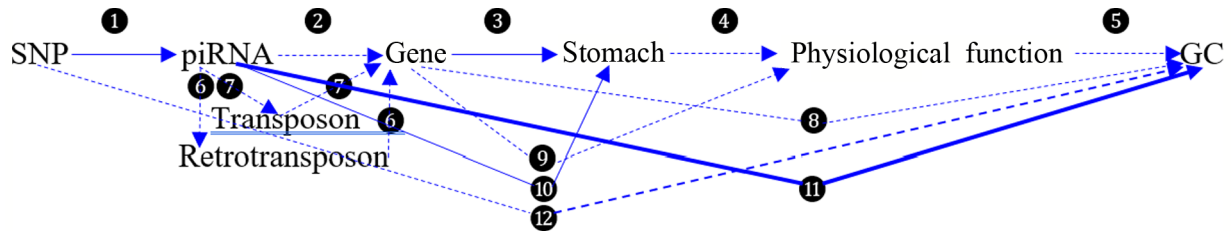

Figure S4. HeatMap and hierarchical clustering. (x-axis, individuals; y-axis, piRNAs; color: Expression levels).

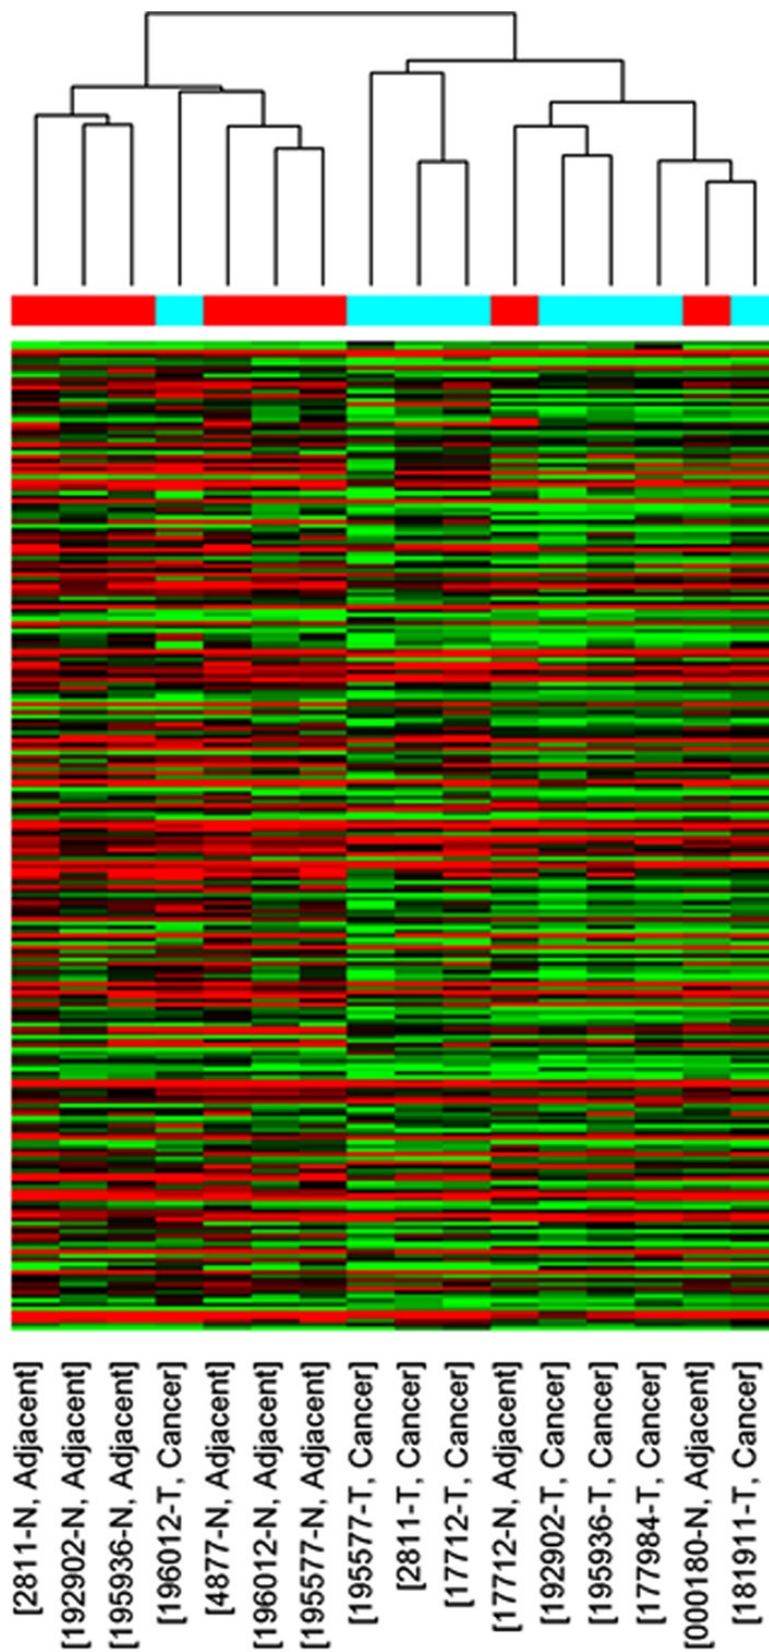

Figure S5. Representative images of PIWIL4 protein expression in gastric cancer and adjacent normal tissues. (A and B) High expression of PIWIL4 in gastric cancer. (C and D) Low expression of PIWIL4 in matched adjacent normal tissues. A and C: IHC; magnification x100; scale bars, 200  $\mu$ m. B and D: IHC, magnification x 400; scale bars, 50  $\mu$ m. IHC, immunohistochemistry.

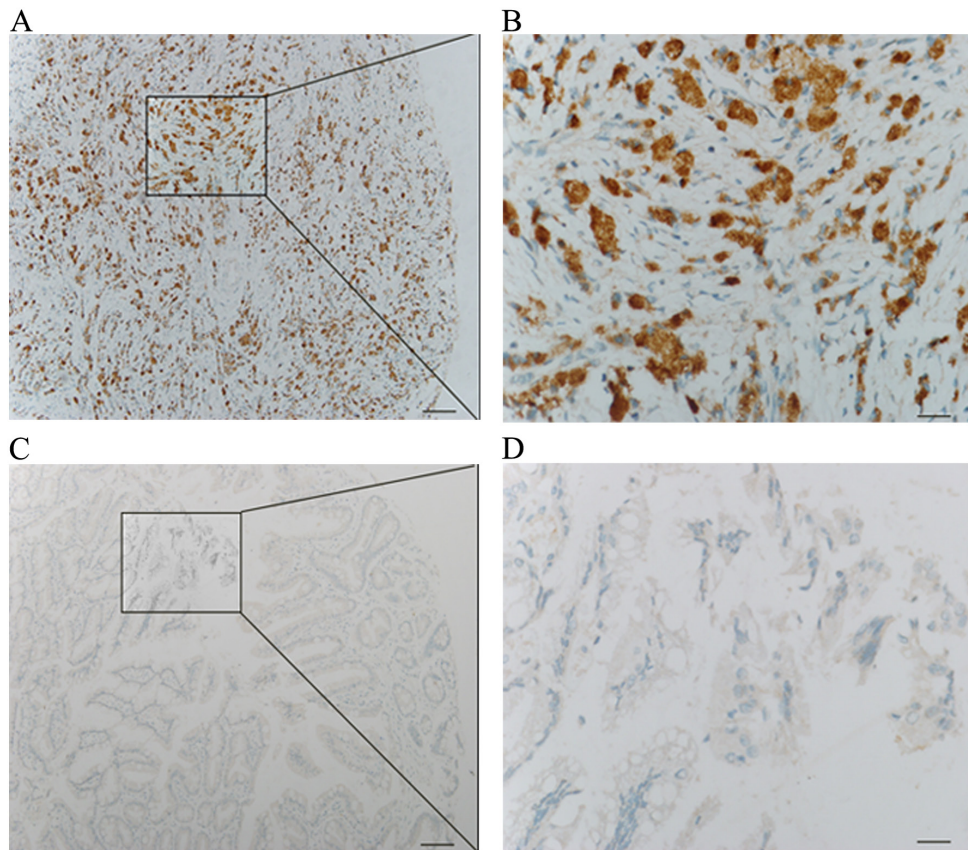

Table S1. All stomach piRNAs significantly differentially expressed between cases and controls.

| piRNA                  | Alias         | Length (nt) | Chr   | Normalized intensity |         | Cancer vs. control |         | Potential TE target [type] | Gene                         | Associated phenotypes                                                                                                                 |
|------------------------|---------------|-------------|-------|----------------------|---------|--------------------|---------|----------------------------|------------------------------|---------------------------------------------------------------------------------------------------------------------------------------|
|                        |               |             |       | Cancer               | Control | FC                 | P-value |                            |                              |                                                                                                                                       |
| DQ580689               | piR-hsa-10915 | 28          | chr1  | 180                  | 90      | 2.0 ↑              | 0.016   | MIRc [SINE]                | <i>NBPF3<sup>S</sup></i>     | Breast cancer (2), cancer cells (3)                                                                                                   |
| DQ600515               | piR-hsa-30715 | 29          | chr1  | 4,071                | 1,668   | 2.4 ↑              | 0.041   | AluY [SINE]                | <i>ATAD3B<sup>S</sup></i>    | Phylogeny of <i>Babesia</i> and <i>Theileria</i> (4,5)                                                                                |
| DQ571419               | piR-hsa-1742  | 28          | chr1  | 1,443                | 605     | 2.4 ↑              | 0.032   | AluJr [SINE]               | <i>RPS8<sup>S</sup></i>      | Gastric cancer (6,7), pancreatic cancer (8), prostate cancer (9), lung cancer (10,11), cervical cancer cells (12), breast cancer (13) |
| DQ588779               | piR-hsa-19076 | 29          | chr1  | 14,194               | 6,844   | 2.1 ↑              | 0.037   | AluSz6 [SINE]              | <i>SKP<sup>S</sup></i>       | Metastatic colorectal carcinoma (14), colon cancer (15,16), lung cancer (17), hepatic tumors (18,19), epithelial cancer (20)          |
| DQ601419               | piR-hsa-30907 | 27          | chr1  | 16                   | 8       | 2.1 ↑              | 0.038   | AluSz [SINE]               | <i>FAM163A</i>               | Breast cancer (21)                                                                                                                    |
| DQ575884 <sup>E</sup>  | piR-hsa-6147  | 32          | chr2  | 1,393                | 691     | 2.0 ↑              | 0.017   | L1M4 [LINE]                | to <i>EPCAM<sup>S</sup></i>  |                                                                                                                                       |
| DQ594797               | piR-hsa-25103 | 26          | chr2  | 14                   | 7       | 2.1 ↑              | 0.042   | L1Mca [LINE]               | to <i>TEKT4</i>              |                                                                                                                                       |
| DQ578739 <sup>EC</sup> | piR-hsa-8966  | 31          | chr2  | 1,709                | 3,422   | 2.0 ↓              | 0.007   | L1PA8 [LINE]               | to <i>LOC100507334</i>       |                                                                                                                                       |
| DQ571556 <sup>EC</sup> | piR-hsa-1879  | 27          | chr2  | 10                   | 21      | 2.0 ↓              | 0.023   | MSTA [LTR]                 | to <i>SPATA31C1</i>          |                                                                                                                                       |
| DQ595533 <sup>EC</sup> | piR-hsa-25780 | 29          | chr3  | 13,314               | 6,148   | 2.2 ↑              | 0.035   | L1MD [LINE]                | <i>COLQ<sup>S</sup></i>      | Congenital myasthenia (>30 studies: e.g. (22))                                                                                        |
| DQ575557 <sup>C</sup>  | piR-hsa-5835  | 29          | chr3  | 25                   | 83      | 3.4 ↓              | 0.003   | L2b [LINE]                 | to <i>IQSEC1<sup>S</sup></i> |                                                                                                                                       |
| DQ594440 <sup>C</sup>  | piR-hsa-24659 | 31          | chr3  | 60                   | 164     | 2.7 ↓              | 0.004   | L2b [LINE]                 | to <i>IQSEC1<sup>S</sup></i> |                                                                                                                                       |
| DQ593293 <sup>EC</sup> | piR-hsa-23556 | 31          | chr5  | 710                  | 1,595   | 2.2 ↓              | 0.049   | AluSq2 [SINE]              | to <i>C5orf52</i>            |                                                                                                                                       |
| DQ573237 <sup>EC</sup> | piR-hsa-3530  | 32          | chr6  | 33                   | 71      | 2.2 ↓              | 0.038   | L1MB7 [LINE]               | <i>SAYSDF<sup>S</sup></i>    | Blood pressure [dbGaP]                                                                                                                |
| DQ587262 <sup>C</sup>  | piR-hsa-17553 | 31          | chr6  | 97                   | 233     | 2.4 ↓              | 0.003   | -                          | to <i>LOC100507584</i>       |                                                                                                                                       |
| DQ580665 <sup>EC</sup> | piR-hsa-10891 | 26          | chr7  | 2,349                | 5,133   | 2.2 ↓              | 0.041   | AluSq2 [SINE]              | <i>POLR2F<sup>S</sup></i>    | Lung cancer (23)                                                                                                                      |
| DQ594511               | piR-hsa-24730 | 29          | chr8  | 22                   | 45      | 2.0 ↓              | 0.004   | AluY [SINE]                | to <i>LOC100287846</i>       |                                                                                                                                       |
| DQ572848 <sup>C</sup>  | piR-hsa-3171  | 30          | chr9  | 22                   | 8       | 2.7 ↑              | 0.024   | -                          | to <i>TLE4<sup>S</sup></i>   | Colorectal cancer (24), myeloid leukemia (25)                                                                                         |
| DQ590922 <sup>C</sup>  | piR-hsa-21201 | 29          | chr9  | 32                   | 10      | 3.1 ↑              | 0.036   | -                          | to <i>TLE4<sup>S</sup></i>   | Colorectal cancer (24), myeloid leukemia (25)                                                                                         |
| DQ583443 <sup>EC</sup> | piR-hsa-13723 | 30          | chr9  | 1,582                | 3,683   | 2.3 ↓              | 0.015   | -                          | <i>FAM225A</i>               |                                                                                                                                       |
| DQ583442 <sup>C</sup>  | piR-hsa-13722 | 29          | chr9  | 704                  | 2,000   | 2.8 ↓              | 0.039   | -                          | <i>FAM225A</i>               |                                                                                                                                       |
| DQ580779               | piR-hsa-11005 | 28          | chr9  | 61                   | 184     | 3.0 ↓              | 0.035   | MERS5A [DNA]               | <i>TMOD1<sup>S</sup></i>     | Oral cancer (26)                                                                                                                      |
| DQ598137               | piR-hsa-28352 | 28          | chr10 | 15                   | 58      | 4.0 ↓              | 0.017   | -                          | <i>NUTM2A</i>                |                                                                                                                                       |
| DQ600670               | piR-hsa-30958 | 30          | chr11 | 4,410                | 1,805   | 2.4 ↑              | 0.032   | AluJb [SINE]               | <i>EED<sup>S</sup></i>       | Colorectal cancer (27,28)                                                                                                             |
| DQ573078 <sup>C</sup>  | piR-hsa-3386  | 30          | chr11 | 28                   | 62      | 2.2 ↓              | 0.032   | MER61A [LTR]               | to <i>CHST1<sup>S</sup></i>  | Glucose [dbGaP]                                                                                                                       |
| DQ571073 <sup>EC</sup> | piR-hsa-231   | 26          | chr12 | 9                    | 19      | 2.1 ↓              | 0.02    | HERV9-int [LTR]            | to <i>CLU1<sup>S</sup></i>   | Chronic lymphocytic leukemia (>10 studies: e.g. (29))                                                                                 |



Table S1. Continued.

| piRNA                   | Alias         | Length (nt) | Chr   | Normalized intensity |         |       | Cancer vs. control |                  | Potential TE target [type]    | Gene                                                                                                                                      | Associated phenotypes |
|-------------------------|---------------|-------------|-------|----------------------|---------|-------|--------------------|------------------|-------------------------------|-------------------------------------------------------------------------------------------------------------------------------------------|-----------------------|
|                         |               |             |       | Cancer               | Control | FC    | P-value            | FC               |                               |                                                                                                                                           |                       |
| DQ600254 <sup>E,C</sup> | piR-hsa-30454 | 29          | chr14 | 144                  | 354     | 2.5 ↓ | 0.027              | MamGyp-int [LTR] | <i>PNMA1</i> <sup>S</sup>     | Pancreatic ductal, adenocarcinoma (30), paraneoplastic CNS disease (31-33)                                                                |                       |
| DQ598301 <sup>C</sup>   | piR-hsa-28516 | 30          | chr15 | 22                   | 10      | 2.2 ↑ | 0.031              | -                | to <i>TARSL2</i> <sup>S</sup> |                                                                                                                                           |                       |
| DQ570858                | piR-hsa-1109  | 31          | chr15 | 30                   | 106     | 3.5 ↓ | 0.005              | L1ME2 [LINE]     | <i>HERC2P7</i>                |                                                                                                                                           |                       |
| DQ572562 <sup>E,C</sup> | piR-hsa-2798  | 29          | chr15 | 592                  | 1,356   | 2.3 ↓ | 0.011              | -                | <i>DNMIP46</i>                |                                                                                                                                           |                       |
| DQ570015                | piR-hsa-339   | 30          | chr15 | 429                  | 1,642   | 3.8 ↓ | 0.036              | MIR1_Amn [SINE]  | <i>GOLGA8A</i> <sup>S</sup>   |                                                                                                                                           |                       |
| DQ59214 <sup>C</sup>    | piR-hsa-25475 | 31          | chr15 | 11                   | 24      | 2.2 ↓ | 0.037              | AluJo [SINE]     | <i>DNMIP46</i>                |                                                                                                                                           |                       |
| DQ590386 <sup>E,C</sup> | piR-hsa-18709 | 29          | chr16 | 11,953               | 5,766   | 2.1 ↑ | 0.046              | L1MB7 [LINE]     | <i>VAC14</i> <sup>S</sup>     | Neurodegeneration (34)                                                                                                                    |                       |
| DQ595534 <sup>E,C</sup> | piR-hsa-25781 | 30          | chr16 | 11,307               | 5,429   | 2.1 ↑ | 0.038              | L1MB7 [LINE]     | <i>VAC14</i> <sup>S</sup>     | Neurodegeneration (34)                                                                                                                    |                       |
| DQ571813 <sup>E,C</sup> | piR-hsa-2107  | 31          | chr16 | 12,123               | 5,710   | 2.1 ↑ | 0.046              | L1MB7 [LINE]     | <i>VAC14</i> <sup>S</sup>     | Neurodegeneration (34)                                                                                                                    |                       |
| DQ590827                | piR-hsa-21123 | 30          | chr16 | 179                  | 367     | 2.0 ↓ | 0.037              | AluIb [SINE]     | <i>DHODH</i> <sup>S</sup>     | Melanoma (35)                                                                                                                             |                       |
| DQ583301                | piR-hsa-13610 | 26          | chr17 | 18                   | 53      | 3.0 ↓ | 0.018              | AluIb [SINE]     | <i>LRRC37A4P</i> <sup>S</sup> | Gastric carcinoma (36), breast cancer (37), bladder cancer (38), oral squamous cell carcinoma (39), ovarian carcinomas (40), obesity (41) |                       |
| DQ588880                | piR-hsa-19177 | 30          | chr17 | 30                   | 67      | 2.2 ↓ | 0.032              | -                | to <i>HOXB5</i> <sup>S</sup>  |                                                                                                                                           |                       |
| DQ579739                | piR-hsa-9994  | 30          | chr19 | 1,844                | 774     | 2.4 ↑ | 0.029              | AluSc8 [SINE]    | <i>CXCL17</i> <sup>S</sup>    | Colon cancer (42), hepatocellular carcinoma (43), lung macrophages (44), tumor progression (45), pancreatic carcinogenesis (46)           |                       |
| DQ576821                | piR-hsa-7157  | 28          | chr19 | 28                   | 77      | 2.7 ↓ | 0.004              | FLAM_A [SINE]    | <i>ZNF490</i>                 |                                                                                                                                           |                       |
| DQ577343 <sup>E,C</sup> | piR-hsa-7633  | 29          | chr19 | 515                  | 1,807   | 3.5 ↓ | 0.023              | THE1D [LTR]      | to <i>LOC400685</i>           |                                                                                                                                           |                       |
| DQ577344 <sup>E,C</sup> | piR-hsa-7634  | 30          | chr19 | 555                  | 1,740   | 3.1 ↓ | 0.006              | THE1D [LTR]      | to <i>LOC400685</i>           |                                                                                                                                           |                       |
| DQ577345 <sup>E,C</sup> | piR-hsa-7635  | 31          | chr19 | 383                  | 969     | 2.5 ↓ | 0.003              | THE1D [LTR]      | to <i>LOC400685</i>           |                                                                                                                                           |                       |
| DQ583043 <sup>E,C</sup> | piR-hsa-13366 | 30          | chr19 | 32                   | 135     | 4.2 ↓ | 0.015              | L1MDa [LINE]     | to <i>LOC100652909</i>        |                                                                                                                                           |                       |
| DQ570687                | piR-hsa-952   | 28          | chr22 | 910                  | 448     | 2.0 ↑ | 0.012              | Alu [SINE]       | <i>RPL3</i> <sup>S</sup>      | Colon cancer (47-49)                                                                                                                      |                       |
| DQ574146 <sup>E,C</sup> | piR-hsa-4408  | 30          | chr22 | 49                   | 197     | 4.1 ↓ | 0.012              | AluSx3 [SINE]    | <i>IGLL1</i>                  | Myocardial infarction [dbGaP]                                                                                                             |                       |
| DQ574145                | piR-hsa-4407  | 30          | chr22 | 18                   | 75      | 4.2 ↓ | 0.01               | AluSx3 [SINE]    | <i>IGLL1</i>                  | Myocardial infarction [dbGaP]                                                                                                             |                       |
| DQ574148                | piR-hsa-4410  | 30          | chr22 | 25                   | 110     | 4.4 ↓ | 0.012              | AluSx3 [SINE]    | <i>IGLL1</i>                  | Myocardial infarction [dbGaP]                                                                                                             |                       |
| DQ574147 <sup>E,C</sup> | piR-hsa-4409  | 31          | chr22 | 55                   | 208     | 3.8 ↓ | 0.01               | AluSx3 [SINE]    | <i>IGLL1</i>                  | Myocardial infarction [dbGaP]                                                                                                             |                       |
| DQ580529 <sup>E,C</sup> | piR-hsa-10755 | 30          | chr22 | 13                   | 30      | 2.3 ↓ | 0.022              | MER52A [LTR]     | to <i>WBP2NL</i>              | Breast cancer (50-52)                                                                                                                     |                       |

<sup>E</sup>These piRNAs with eQTL signals are nominally controlled by at least one of the genome-wide significant replicated risk variants for gastric cancer ( $1.6 \times 10^{-4} \leq P < 0.05$ ) (Table II). <sup>C</sup>These piRNAs are located in clusters. <sup>S</sup>These genes are expressed in stomach; ↑, upregulated; ↓, downregulated; FC, fold-change. P-values from t-test; 'to', proximate to; dbGaP, referring to dbGaP database ([www.ncbi.nlm.nih.gov/gap](http://www.ncbi.nlm.nih.gov/gap)).

Table SII. mRNA and protein expression levels of top risk genes in the stomach in three independent cohorts.

|                      | UK Europeans (n=176) | American (n=262) | Germany (n=216)         |
|----------------------|----------------------|------------------|-------------------------|
| Databases:           | BioGPS               | GTEEx            | ProteomicsDB            |
| Age at death (years) | 19-96 (45±16)        | 21-70 (41±14)    | -                       |
| Values               | Normalized intensity | TPM              | Raw concentration value |
| Thresholds:          | 36                   | 1                | 10 ppm                  |
| Expression levels:   |                      |                  |                         |
| <i>CXCL17</i>        | -                    | 328.0            | -                       |
| <i>EPCAM</i>         | -                    | 69.8             | 50                      |
| <i>RPL3</i>          | -                    | 1147.0           | 475                     |
| <i>RPS8</i>          | -                    | 539.6            | 286                     |

n, the sample size; TPM, Transcripts Per Kilobase Million; '-', missing data. Databases: i) BioGPS: The numbers in these columns are intensity values from Affymetrix Human ST 1.0 exon arrays; ii) GTEEx: The numbers in this column are TPM values from RNA-Seq; iii) ProteomicsDB: The numbers in this column are ppm values from mass spectrometry-based proteomics arrays.

Table SIII. Genome-wide significant and replicated risk variants for gastric carcinoma.

| SNP        | Allele | Location       | Gene          | Functional class            | Splicing influence | Allele frequency |           | Study #1 |                     | Study #2 |                     | Study #3 |                     | Study #4 |                    |      |
|------------|--------|----------------|---------------|-----------------------------|--------------------|------------------|-----------|----------|---------------------|----------|---------------------|----------|---------------------|----------|--------------------|------|
|            |        |                |               |                             |                    | Allele           | Europeans | Chinese  | P-value             | Refs.    | P-value             | Refs.    | P-value             | Ref.     | P-value            | Ref. |
| rs4072037  | T/C    | chr1:155192276 | <i>MUC1</i>   | splice_acceptor<br>_variant | Yes                | T                | 0.576     | 0.833    | $7 \times 10^{-8}$  | (53)     | $4 \times 10^{-7}$  | (54)     | $6 \times 10^{-17}$ | (55)     | $2 \times 10^{-9}$ | (56) |
| rs13361707 | C/T    | chr5:40791782  | <i>PRKAA1</i> | intron_variant              |                    | C                | 0.768     | 0.500    | $8 \times 10^{-29}$ | (57)     | $1 \times 10^{-10}$ | (55)     |                     |          |                    |      |
| rs2294008  | C/T    | chr8:142680513 | <i>PSCA</i>   | 5_prime_UTR<br>_variant     | Yes                | C                | 0.576     | 0.738    | $6 \times 10^{-11}$ | (55)     | $2 \times 10^{-7}$  | (56)     |                     |          |                    |      |
